# Supplementary material
Source: MDPI journal article supplement (https://www.mdpi.com/2073-4344/13/11/1407)
Supplement: s1 [file s1]

Archive with 2 entries (2 files):
- 900C-AC.pdf
- Black AC.pdf
