# Supplementary material
Source: MDPI journal article supplement (https://www.mdpi.com/2073-4344/13/11/1407)
Supplement: s1 [file s1 › 900C-AC.pdf]

## Application Note

Company / Department

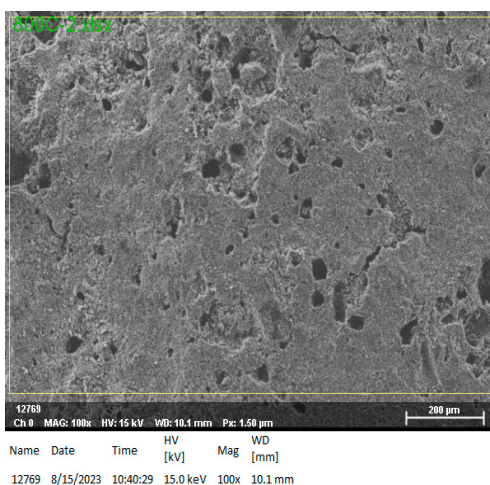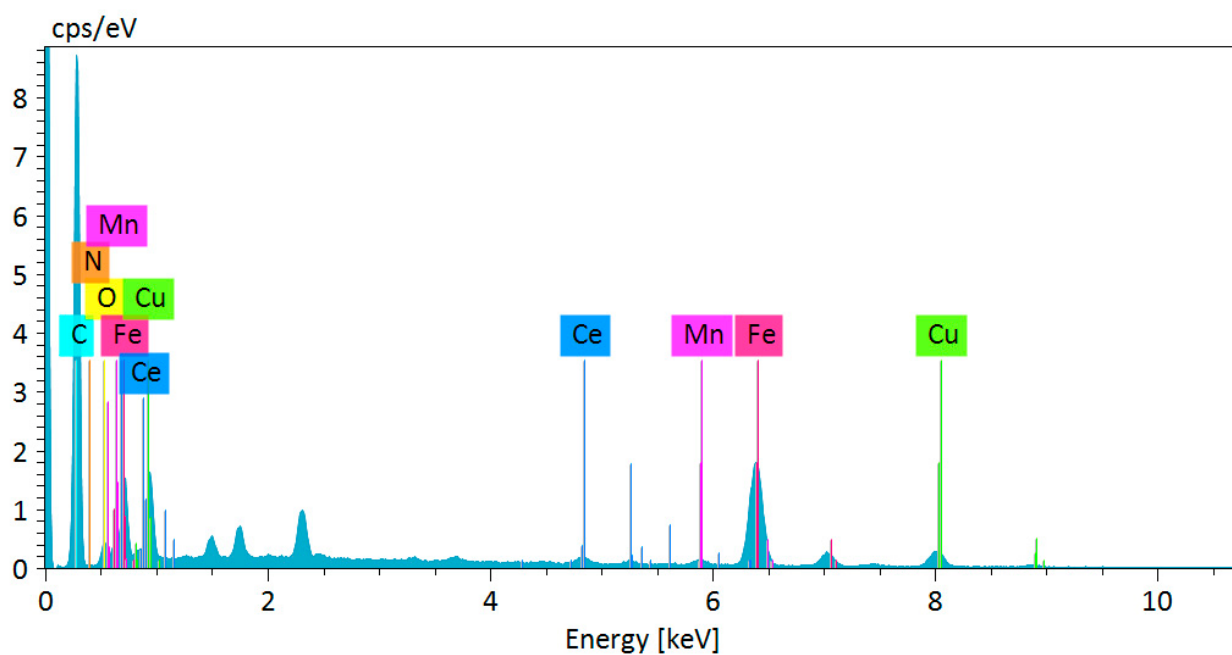

800C-2.xlsx

| Element | At. No. | Netto      | Mass [%]      | Mass Norm. [%] | Atom [%]       | abs. error [%]<br>(3 sigma) |
|---------|---------|------------|---------------|----------------|----------------|-----------------------------|
| C       | 6       | 61282      | 40.689        | 51.814         | 81.987         | 14.254                      |
| N       | 7       | 227        | 0.472         | 0.601          | 0.815          | 0.593                       |
| O       | 8       | 2597       | 1.884         | 2.399          | 2.850          | 1.084                       |
| Mn      | 25      | 752        | 0.367         | 0.467          | 0.162          | 0.130                       |
| Fe      | 26      | 35497      | 23.468        | 29.884         | 10.170         | 2.176                       |
| Cu      | 29      | 6003       | 9.630         | 12.263         | 3.668          | 1.092                       |
| Ce      | 58      | 3466       | 2.019         | 2.571          | 0.349          | 0.286                       |
|         |         | <b>Sum</b> | <b>78.529</b> | <b>100.000</b> | <b>100.000</b> |                             |

# Application Note

Company / Department

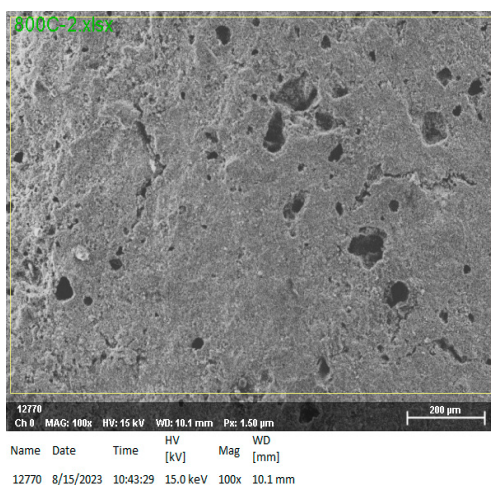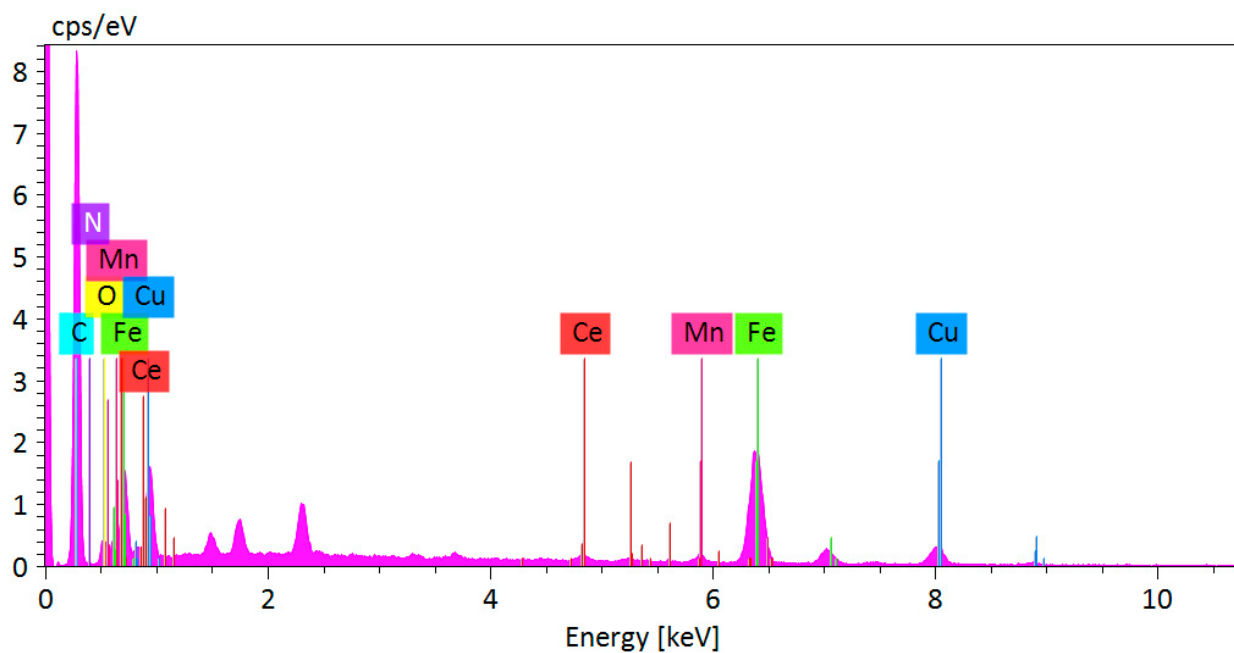

800C-2.xlsx

| Element | At. No. | Netto | Mass [%] | Mass Norm. [%] | Atom [%] | abs. error [%]<br>(3 sigma) |
|---------|---------|-------|----------|----------------|----------|-----------------------------|
| C       | 6       | 26919 | 38.246   | 50.217         | 81.098   | 14.346                      |
| N       | 7       | 99    | 0.426    | 0.559          | 0.774    | 0.716                       |
| O       | 8       | 1175  | 1.766    | 2.319          | 2.812    | 1.223                       |
| Mn      | 25      | 485   | 0.519    | 0.681          | 0.241    | 0.166                       |
| Fe      | 26      | 17281 | 24.478   | 32.139         | 11.163   | 2.319                       |
| Cu      | 29      | 2832  | 8.960    | 11.764         | 3.591    | 1.119                       |
| Ce      | 58      | 1464  | 1.767    | 2.321          | 0.321    | 0.295                       |
|         |         | Sum   | 76.162   | 100.000        | 100.000  |                             |

# Application Note

Company / Department

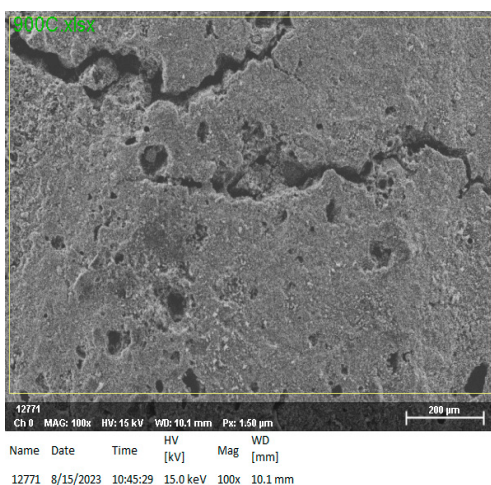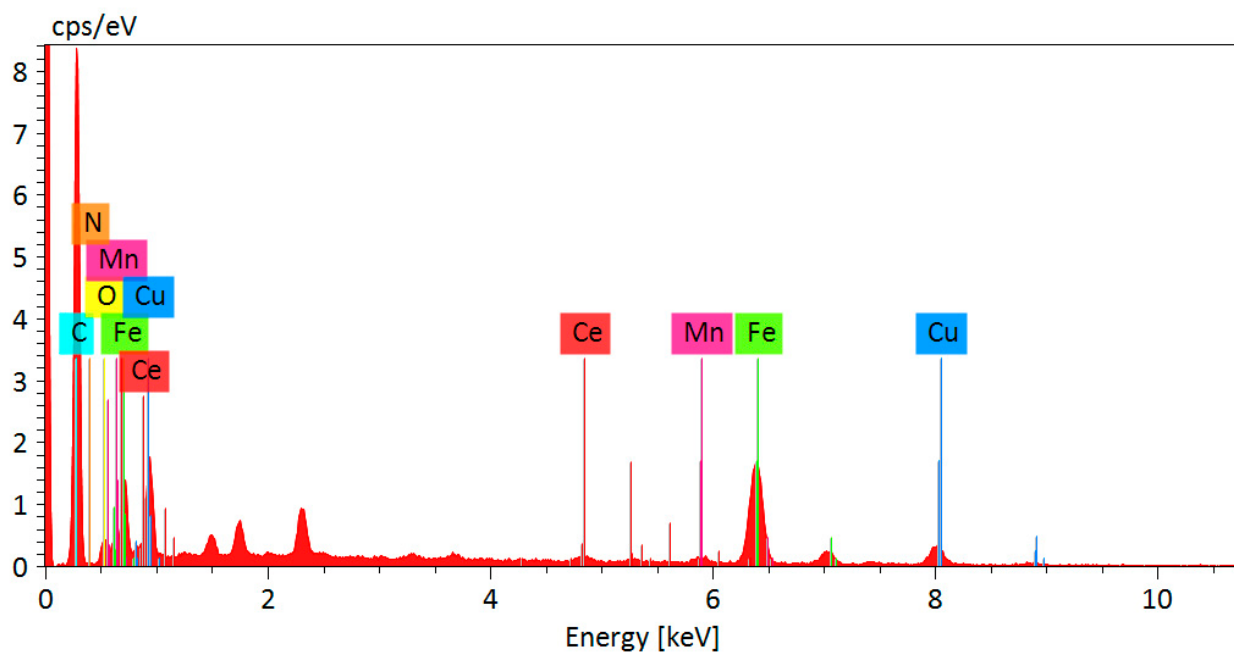

900C.xlsx

| Element | At. No. | Netto      | Mass [%]      | Mass Norm. [%] | Atom [%]       | abs. error [%]<br>(3 sigma) |
|---------|---------|------------|---------------|----------------|----------------|-----------------------------|
| C       | 6       | 19856      | 43.528        | 51.349         | 81.447         | 16.840                      |
| N       | 7       | 79         | 0.543         | 0.640          | 0.871          | 0.969                       |
| O       | 8       | 926        | 2.207         | 2.604          | 3.100          | 1.608                       |
| Mn      | 25      | 364        | 0.556         | 0.656          | 0.227          | 0.183                       |
| Fe      | 26      | 11395      | 26.062        | 30.744         | 10.488         | 2.517                       |
| Cu      | 29      | 2167       | 10.154        | 11.978         | 3.591          | 1.316                       |
| Ce      | 58      | 1023       | 1.721         | 2.030          | 0.276          | 0.311                       |
|         |         | <b>Sum</b> | <b>84.771</b> | <b>100.000</b> | <b>100.000</b> |                             |

# Application Note

Company / Department

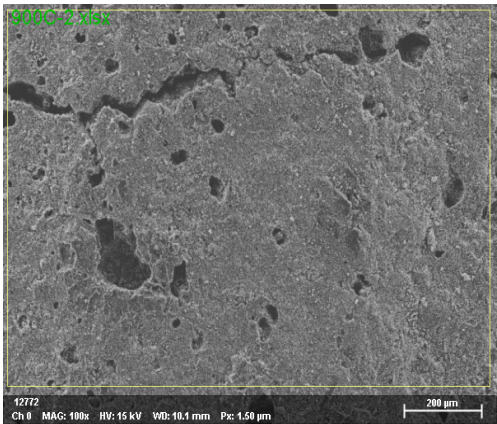

12772  
Ch 0 MAG: 100x HV: 15 kV WD: 10.1 mm Pz: 1.50 µm  
Name Date Time HV Mag WD  
[kV] [mm]  
12772 8/15/2023 10:47:02 15.0 keV 100x 10.1 mm

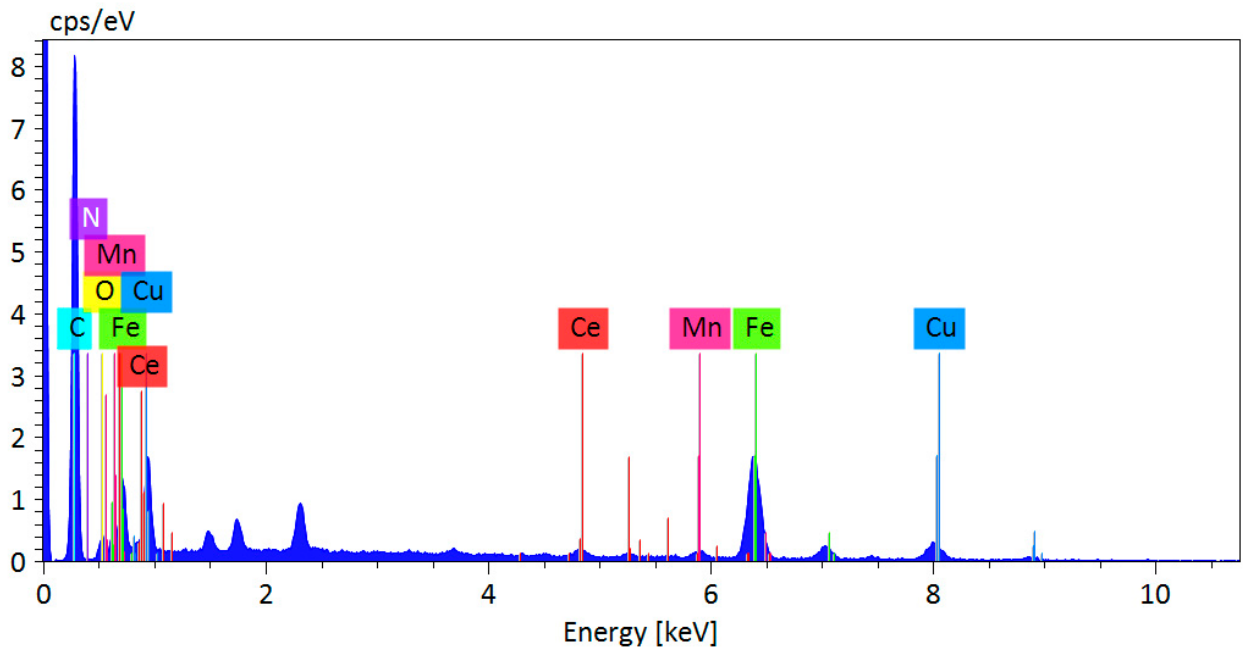

900C-2.xlsx

| Element | At. No. | Netto | Mass [%] | Mass Norm. [%] | Atom [%] | abs. error [%]<br>(3 sigma) |
|---------|---------|-------|----------|----------------|----------|-----------------------------|
| C       | 6       | 23791 | 43.254   | 51.676         | 82.184   | 16.416                      |
| N       | 7       | 66    | 0.375    | 0.448          | 0.610    | 0.740                       |
| O       | 8       | 869   | 1.707    | 2.039          | 2.435    | 1.282                       |
| Mn      | 25      | 482   | 0.611    | 0.730          | 0.254    | 0.182                       |
| Fe      | 26      | 13960 | 26.397   | 31.536         | 10.787   | 2.520                       |
| Cu      | 29      | 2446  | 9.581    | 11.447         | 3.441    | 1.220                       |
| Ce      | 58      | 1299  | 1.778    | 2.124          | 0.290    | 0.303                       |
|         |         | Sum   | 83.703   | 100.000        | 100.000  |                             |

# Application Note

Company / Department

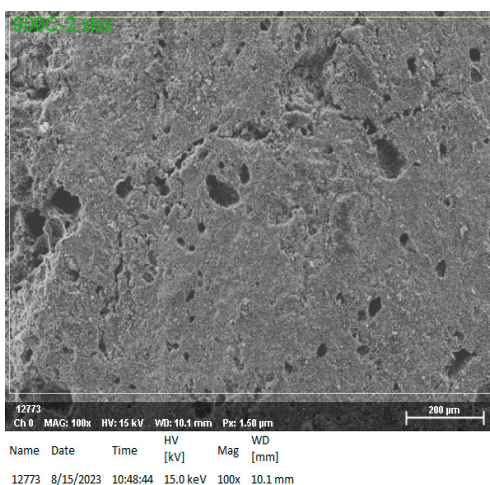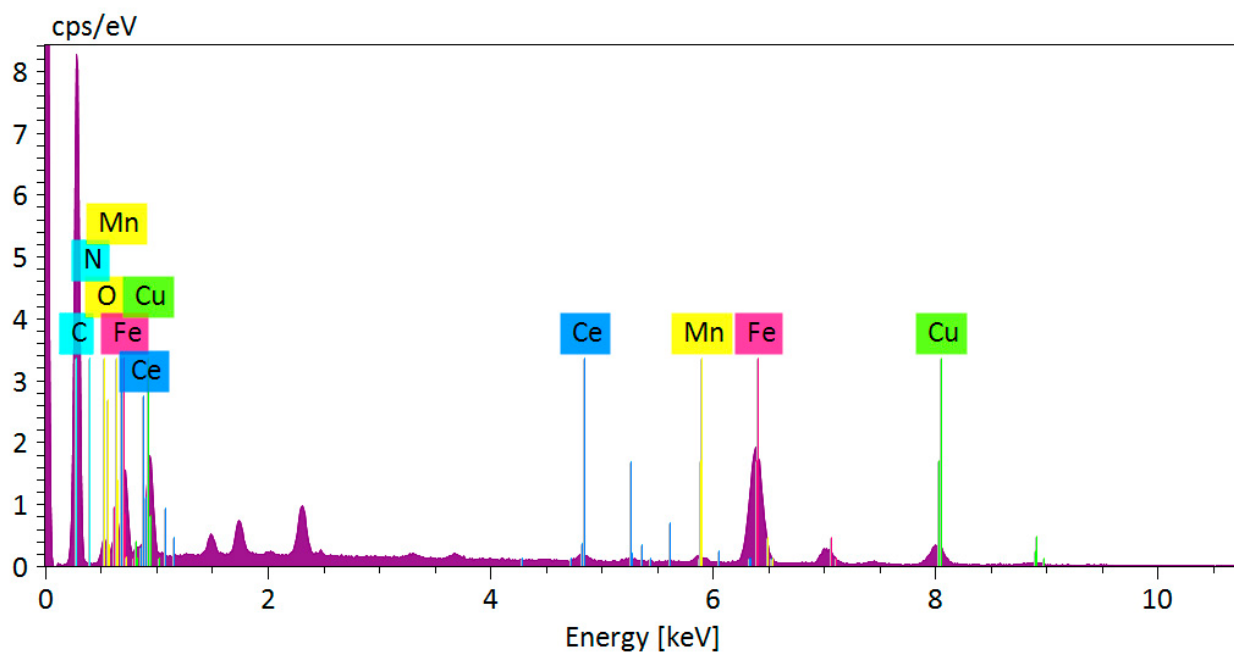

900C-2.xlsx

| Element | At. No. | Netto      | Mass [%]      | Mass Norm. [%] | Atom [%]       | abs. error [%]<br>(3 sigma) |
|---------|---------|------------|---------------|----------------|----------------|-----------------------------|
| C       | 6       | 46116      | 38.180        | 49.814         | 81.283         | 13.663                      |
| N       | 7       | 154        | 0.374         | 0.488          | 0.683          | 0.550                       |
| O       | 8       | 1846       | 1.574         | 2.054          | 2.516          | 0.987                       |
| Mn      | 25      | 563        | 0.314         | 0.410          | 0.146          | 0.127                       |
| Fe      | 26      | 29786      | 22.916        | 29.898         | 10.492         | 2.136                       |
| Cu      | 29      | 5562       | 11.157        | 14.557         | 4.490          | 1.262                       |
| Ce      | 58      | 2783       | 2.130         | 2.779          | 0.389          | 0.306                       |
|         |         | <b>Sum</b> | <b>76.646</b> | <b>100.000</b> | <b>100.000</b> |                             |
