# Supplementary material
Source: MDPI journal article supplement (https://www.mdpi.com/2073-4344/13/11/1407)
Supplement: s1 [file s1 › Black AC.pdf]

## Application Note

Company / Department

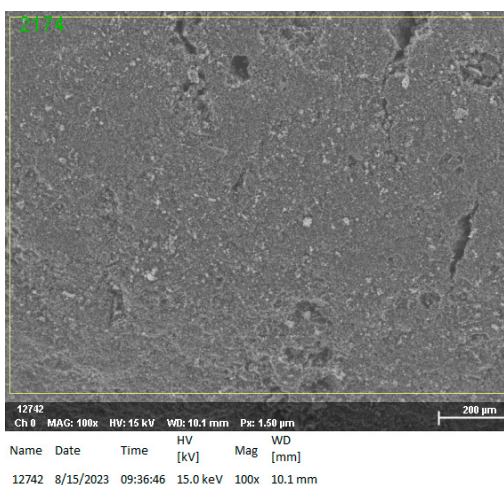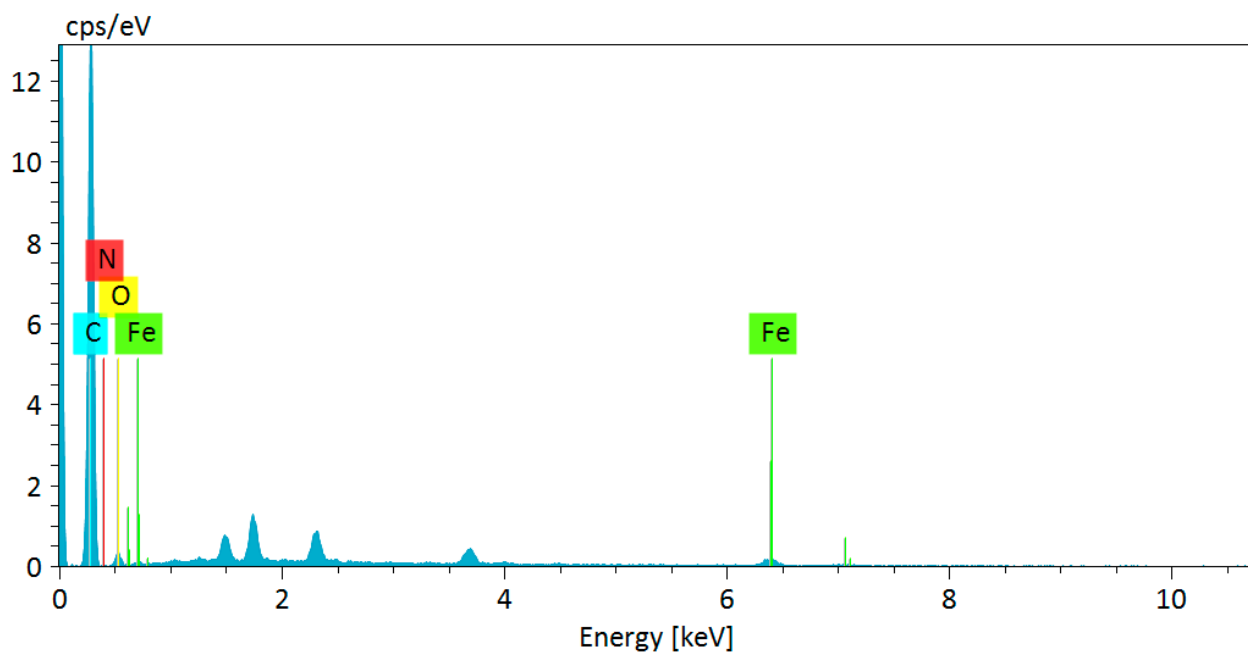

2174

| Element | At. No. | Netto      | Mass [%]       | Mass Norm. [%] | Atom [%]       | abs. error [%]<br>(3 sigma) |
|---------|---------|------------|----------------|----------------|----------------|-----------------------------|
| C       | 6       | 32389      | 86.035         | 86.035         | 92.341         | 31.622                      |
| N       | 7       | 41         | 1.012          | 1.012          | 0.931          | 2.277                       |
| O       | 8       | 802        | 6.502          | 6.502          | 5.239          | 4.780                       |
| Fe      | 26      | 1294       | 6.452          | 6.452          | 1.489          | 0.915                       |
|         |         | <b>Sum</b> | <b>100.000</b> | <b>100.000</b> | <b>100.000</b> |                             |

# Application Note

Company / Department

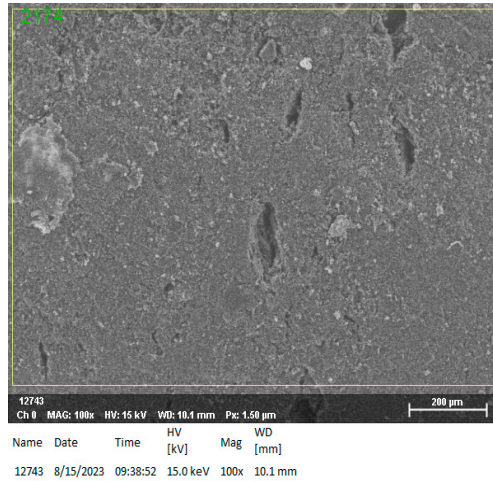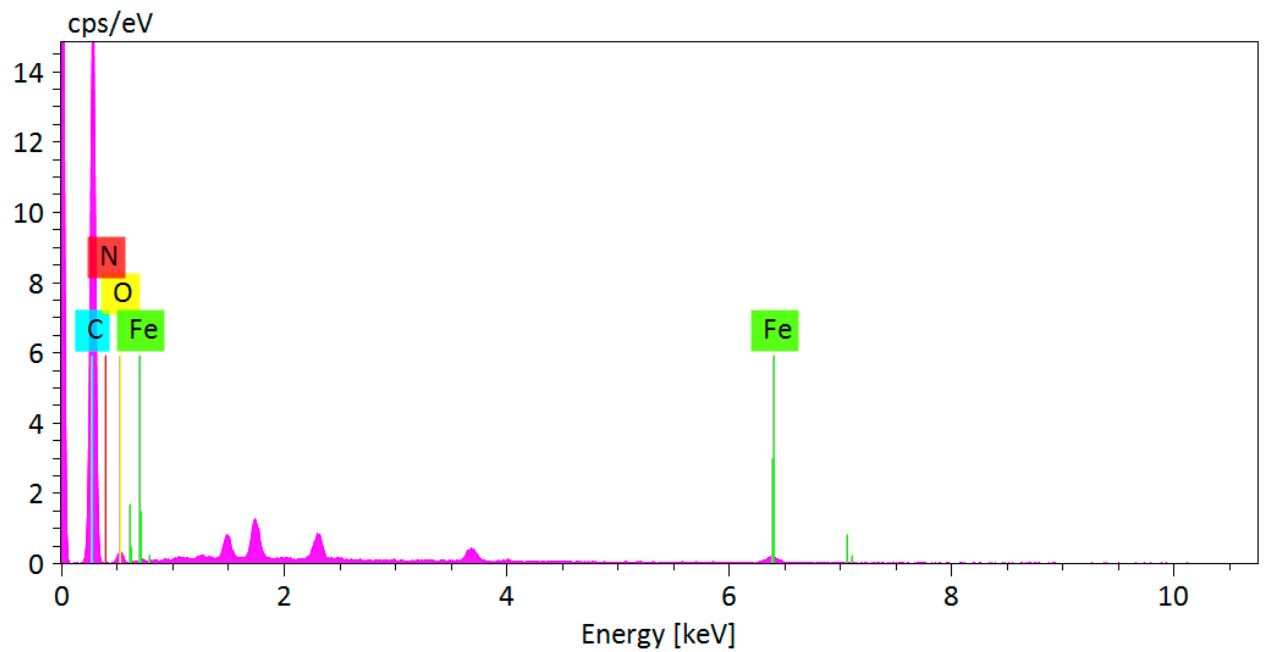

2174

| Element | At. No. | Netto | Mass [%] | Mass Norm. [%] | Atom [%] | abs. error [%]<br>(3 sigma) |
|---------|---------|-------|----------|----------------|----------|-----------------------------|
| C       | 6       | 32297 | 87.171   | 87.171         | 92.474   | 32.047                      |
| N       | 7       | 55    | 1.436    | 1.436          | 1.306    | 2.837                       |
| O       | 8       | 736   | 6.372    | 6.372          | 5.075    | 4.806                       |
| Fe      | 26      | 963   | 5.021    | 5.021          | 1.146    | 0.784                       |
|         |         | Sum   | 100.000  | 100.000        | 100.000  |                             |

# Application Note

Company / Department

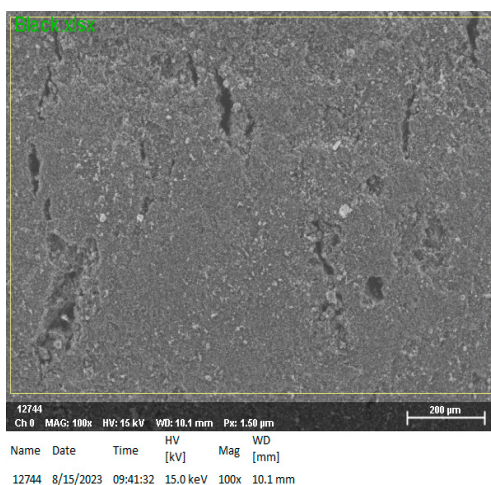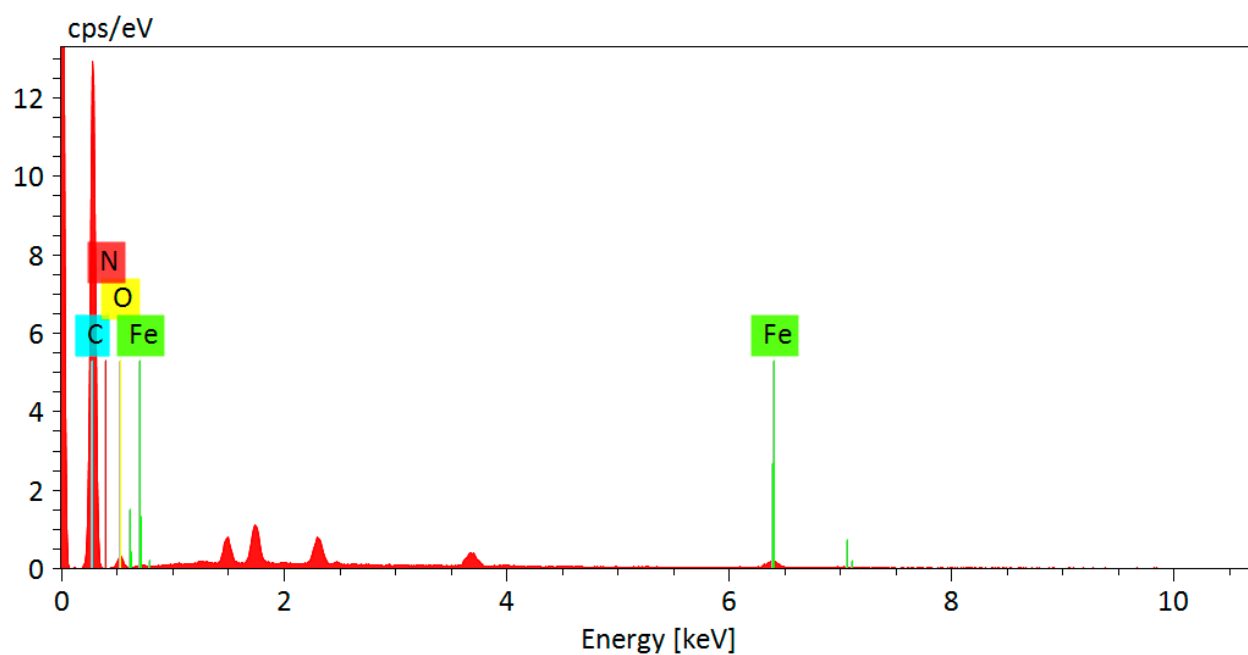

Black.xlsx

| Element | At. No. | Netto      | Mass [%]       | Mass Norm. [%] | Atom [%]       | abs. error [%]<br>(3 sigma) |
|---------|---------|------------|----------------|----------------|----------------|-----------------------------|
| C       | 6       | 42374      | 86.712         | 86.712         | 92.620         | 31.144                      |
| N       | 7       | 37         | 0.716          | 0.716          | 0.656          | 1.706                       |
| O       | 8       | 1058       | 6.704          | 6.704          | 5.376          | 4.560                       |
| Fe      | 26      | 1511       | 5.867          | 5.867          | 1.348          | 0.810                       |
|         |         | <b>Sum</b> | <b>100.000</b> | <b>100.000</b> | <b>100.000</b> |                             |
